# Supplementary material for: Simple chemical preparation of perovskite-based materials using alkali treatment
Source: Royal Society of Chemistry journal article supplement (doi:10.1039/c2ce06598c), 2012-01-01
Supplement: c2ce06598c.pdf [file c2ce06598c.pdf]

## Supporting Information

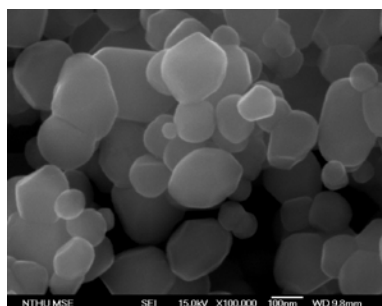

Figure S1 SEM image of TiO<sub>2</sub> precursor.

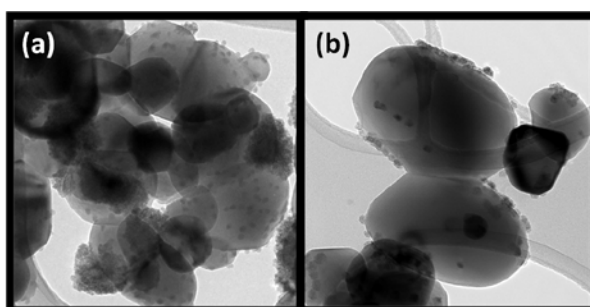

Figure S2 TEM images of (a) BaTiO<sub>3</sub> and (b) SrTiO<sub>3</sub> small nuclei agglomerate on the surface of TiO<sub>2</sub>
